# Supplementary material
Source: Springer Nature journal article supplement (https://www.springermedizin.de/resource/supplementary/13075_2010_3146_MOESM1_ESM.pdf/9693786)

### General Fatigue

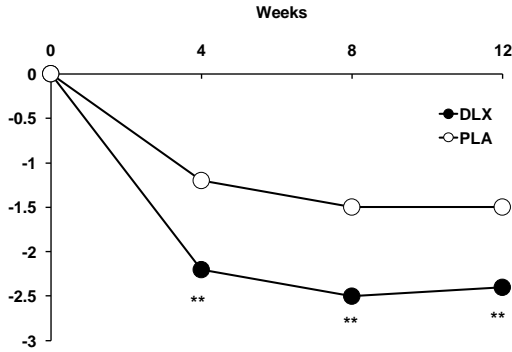

### Mental Fatigue

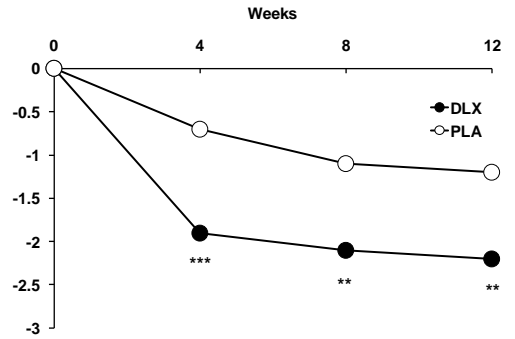

### Physical Fatigue

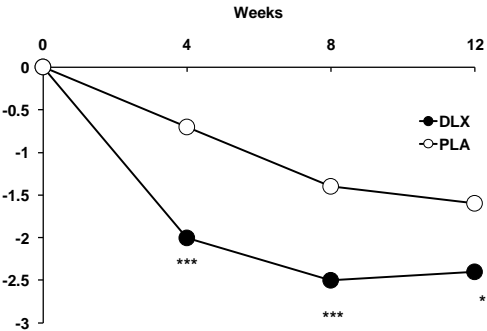

### Reduced Activity

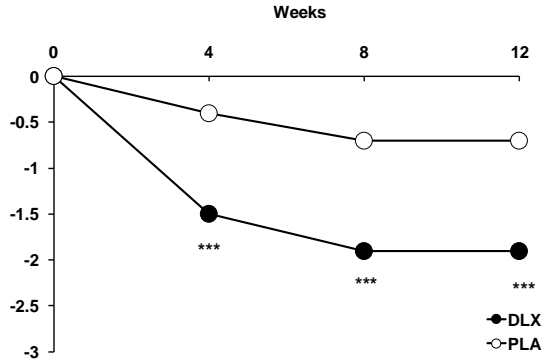

### Reduced Motivation

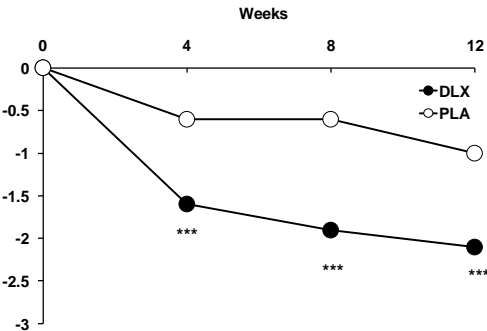

### BPI Average Pain

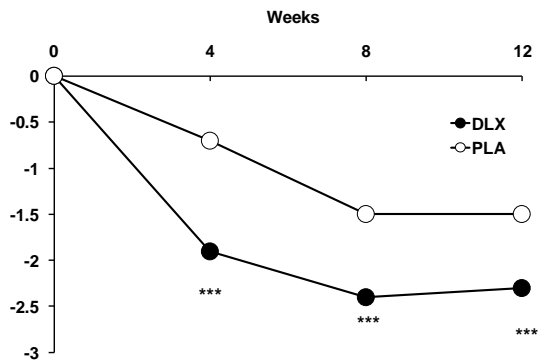

Supplement: MOESM1 [file 9693786]
